# Supplementary material for: Retention of Activity by Antibodies Immobilized on Gold Nanoparticles of Different Sizes: Fluorometric Method of Determination and Comparative Evaluation
Source: MDPI journal article supplement (doi:10.3390/nano11113117), 2021-11-18
Supplement: s1 [file s1]

## **Supplementary Material**

### **Retention of Activity by Antibodies Immobilized on Gold Nanoparticles of Different Sizes: Fluorometric Method of Determination and Comparative Evaluation**

D. V. Sotnikov, N. A. Byzova, A. V. Zherdev, B. B. Dzantiev

A. N. Bach Institute of Biochemistry, Research Center of Biotechnology, Russian Academy of Sciences, 119071 Moscow, Russia

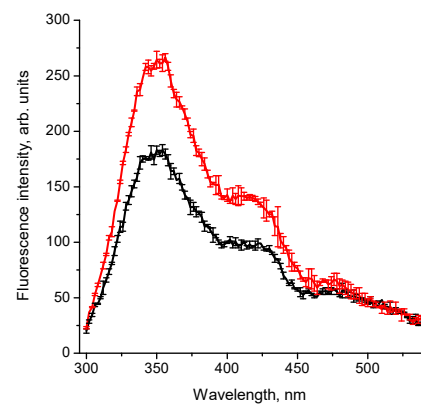

A

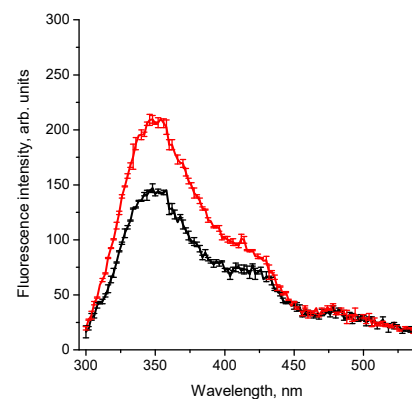

B

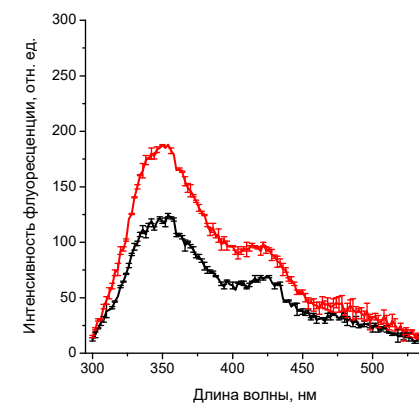

C

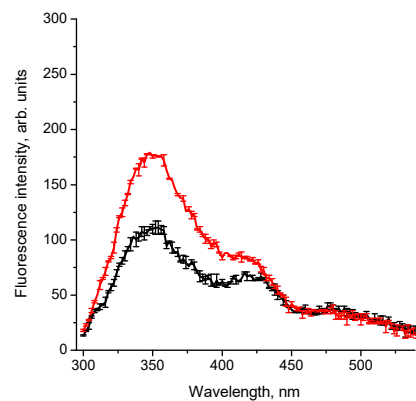

D

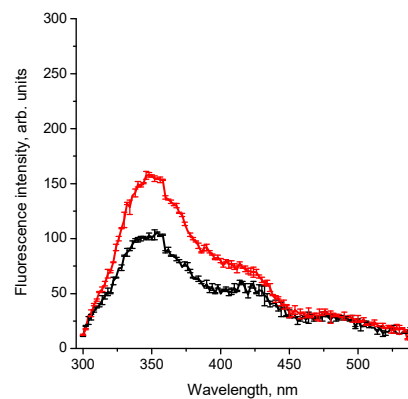

E

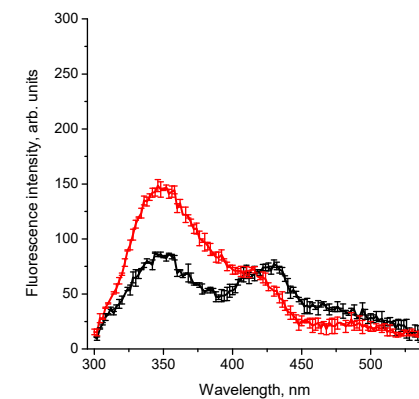

F

**Figure S1.** Fluorescence spectra of supernatants of conjugates GNP1-IgG (A), GNP2-IgG (B), GNP3-IgG (C), GNP4-IgG (D), GNP5-IgG (E), and GNP6-IgG (F). Red spectrum – after addition of 3.15 µg/mL IgG, black spectrum – without IgG.

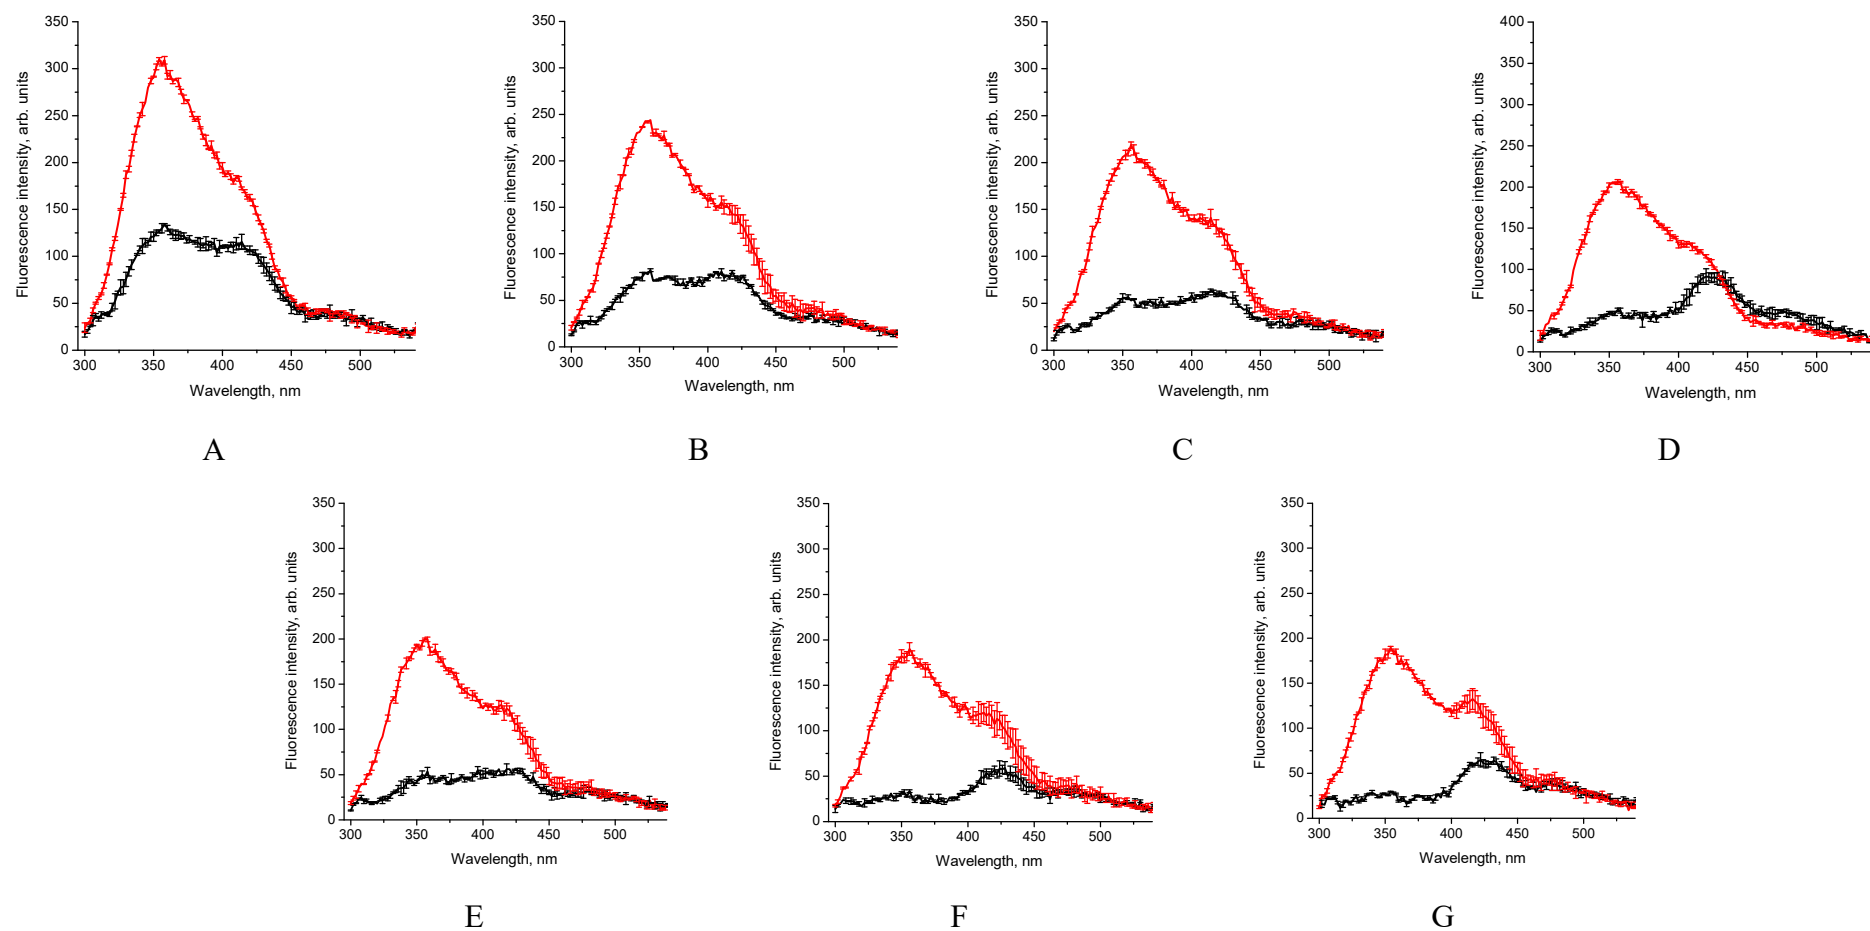

**Figure S2.** Fluorescence spectra of supernatants of the GNP1-IgG conjugate titrated with CRP at concentrations of 10 (A), 8 (B), 6 (C), 4 (D), 2 (E), 1 (F), and 0 (G)  $\mu\text{g/mL}$ . Red spectrum – after addition of 3.15  $\mu\text{g/mL}$  CRP, black spectrum – without CRP.

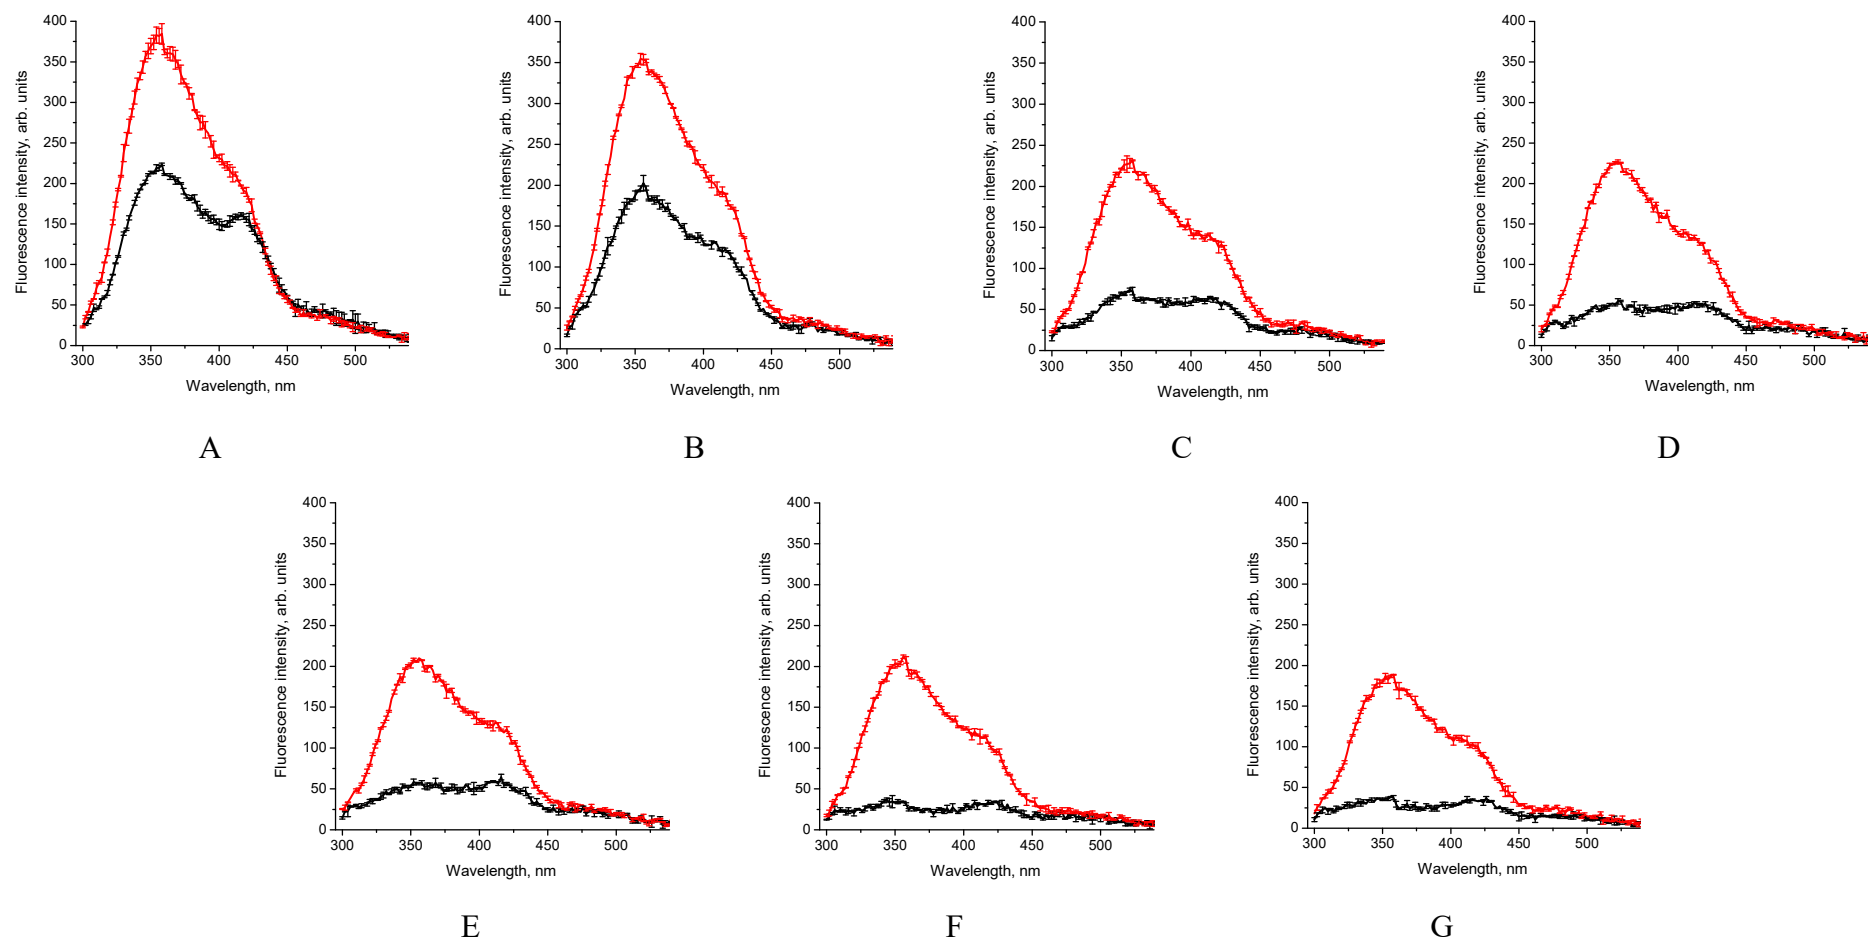

**Figure S3.** Fluorescence spectra of supernatants of the GNP2-IgG conjugate titrated with CRP at concentrations of 10 (A), 8 (B), 6 (C), 4 (D), 2 (E), 1 (F), and 0 (G)  $\mu\text{g/mL}$ . Red spectrum – after addition of 3.15  $\mu\text{g/mL}$  CRP, black spectrum – without CRP.

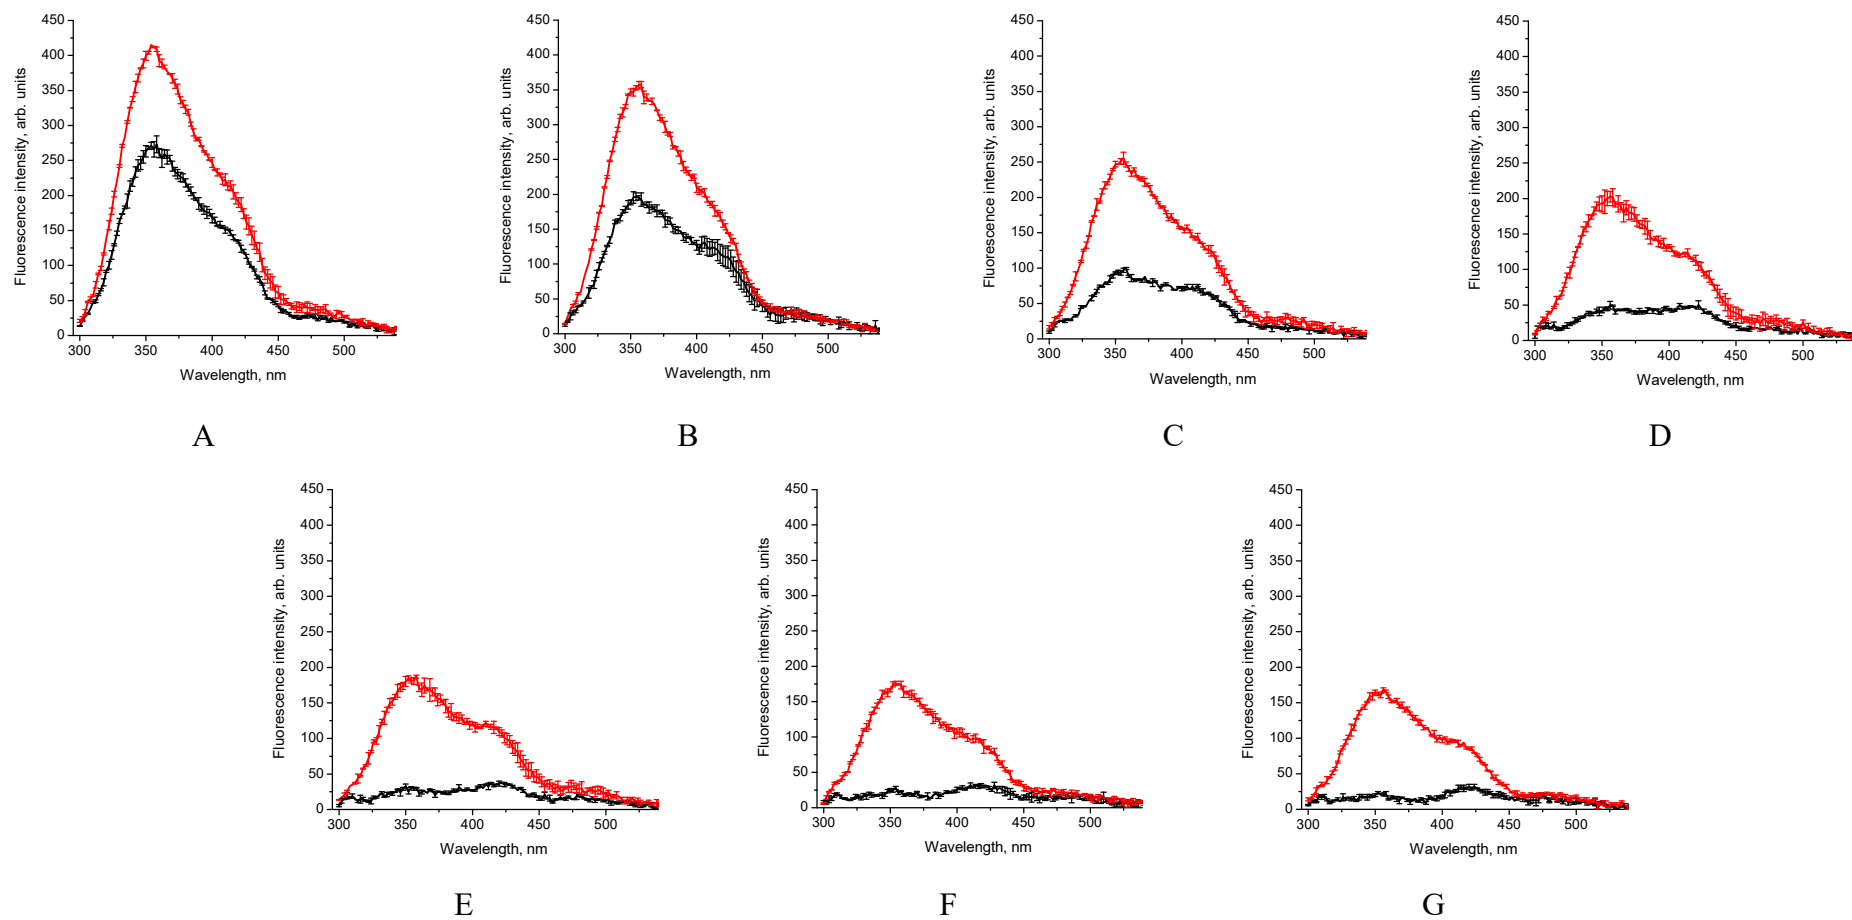

**Figure S4.** Fluorescence spectra of supernatants of the GNP3-IgG conjugate titrated with CRP at concentrations of 10 (A), 8 (B), 6 (C), 4 (D), 2 (E), 1 (F), and 0 (G)  $\mu\text{g/mL}$ . Red spectrum – after addition of 3.15  $\mu\text{g/mL}$  CRP, black spectrum – without CRP.

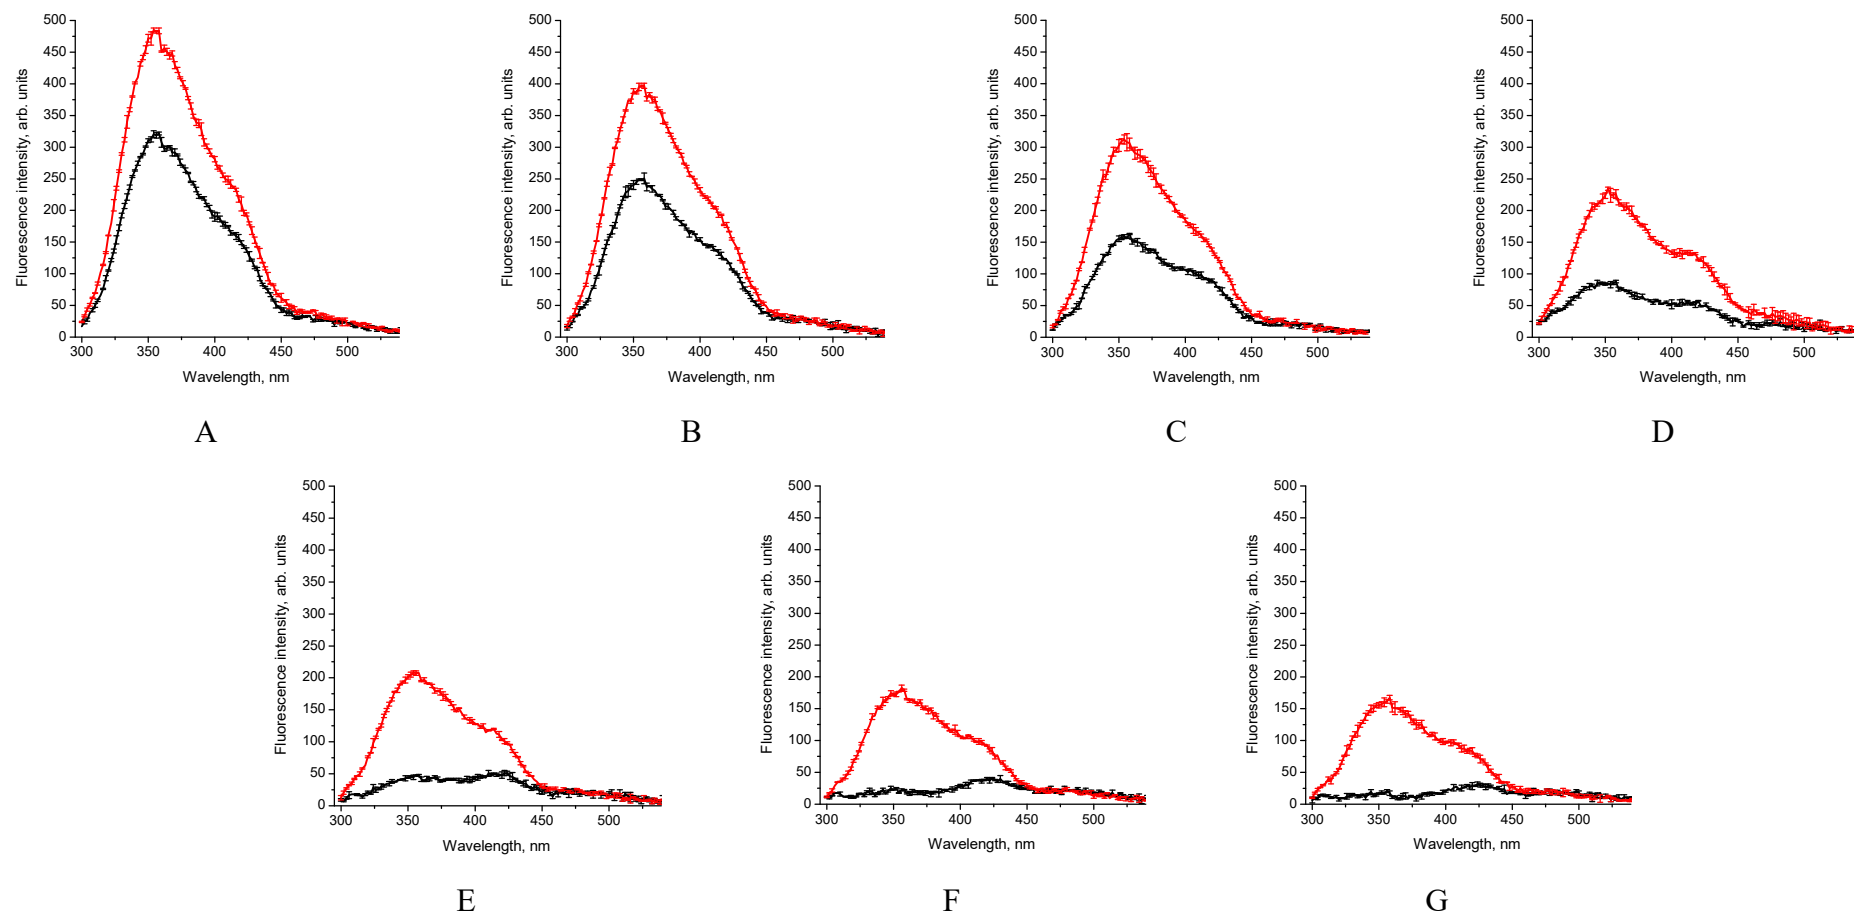

**Figure S5.** Fluorescence spectra of supernatants of the GNP4-IgG conjugate titrated with CRP at concentrations of 10 (A), 8 (B), 6 (C), 4 (D), 2 (E), 1 (F), and 0 (G) µg/mL. Red spectrum – after addition of 3.15 µg/mL CRP, black spectrum – without CRP.

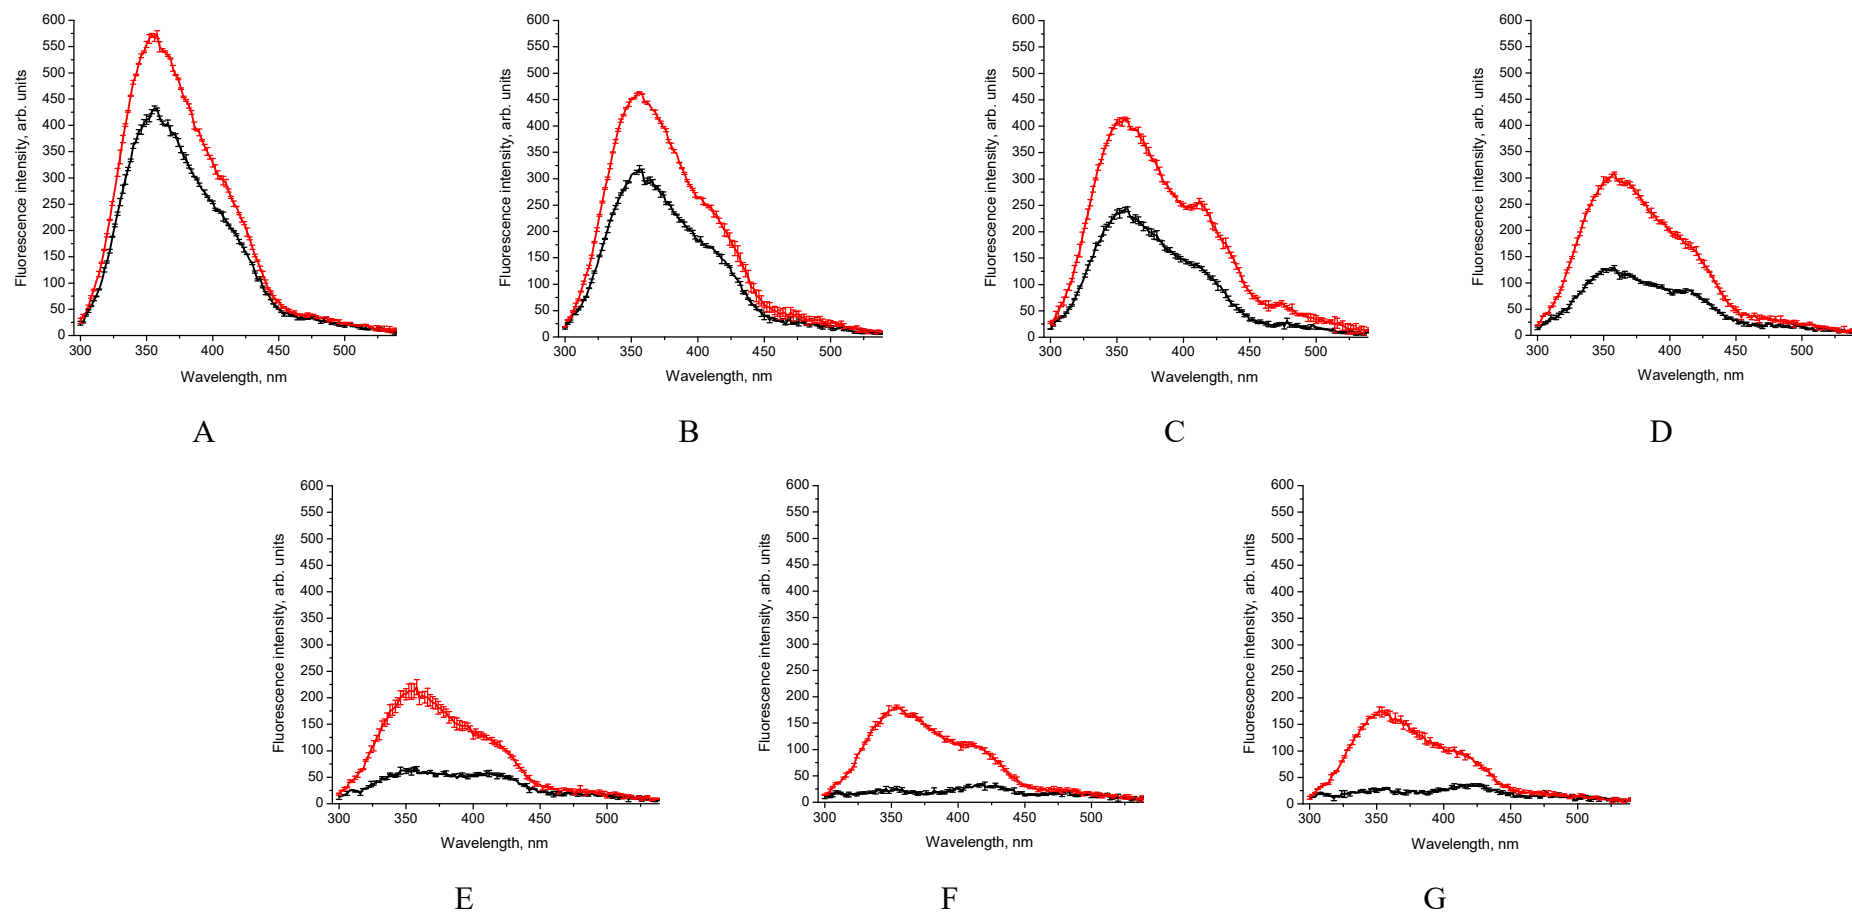

**Figure S6.** Fluorescence spectra of supernatants of the GNP5-IgG conjugate titrated with CRP at concentrations of 10 (A), 8 (B), 6 (C), 4 (D), 2 (E), 1 (F), and 0 (G)  $\mu\text{g/mL}$ . Red spectrum – after addition of 3.15  $\mu\text{g/mL}$  CRP, black spectrum – without CRP.

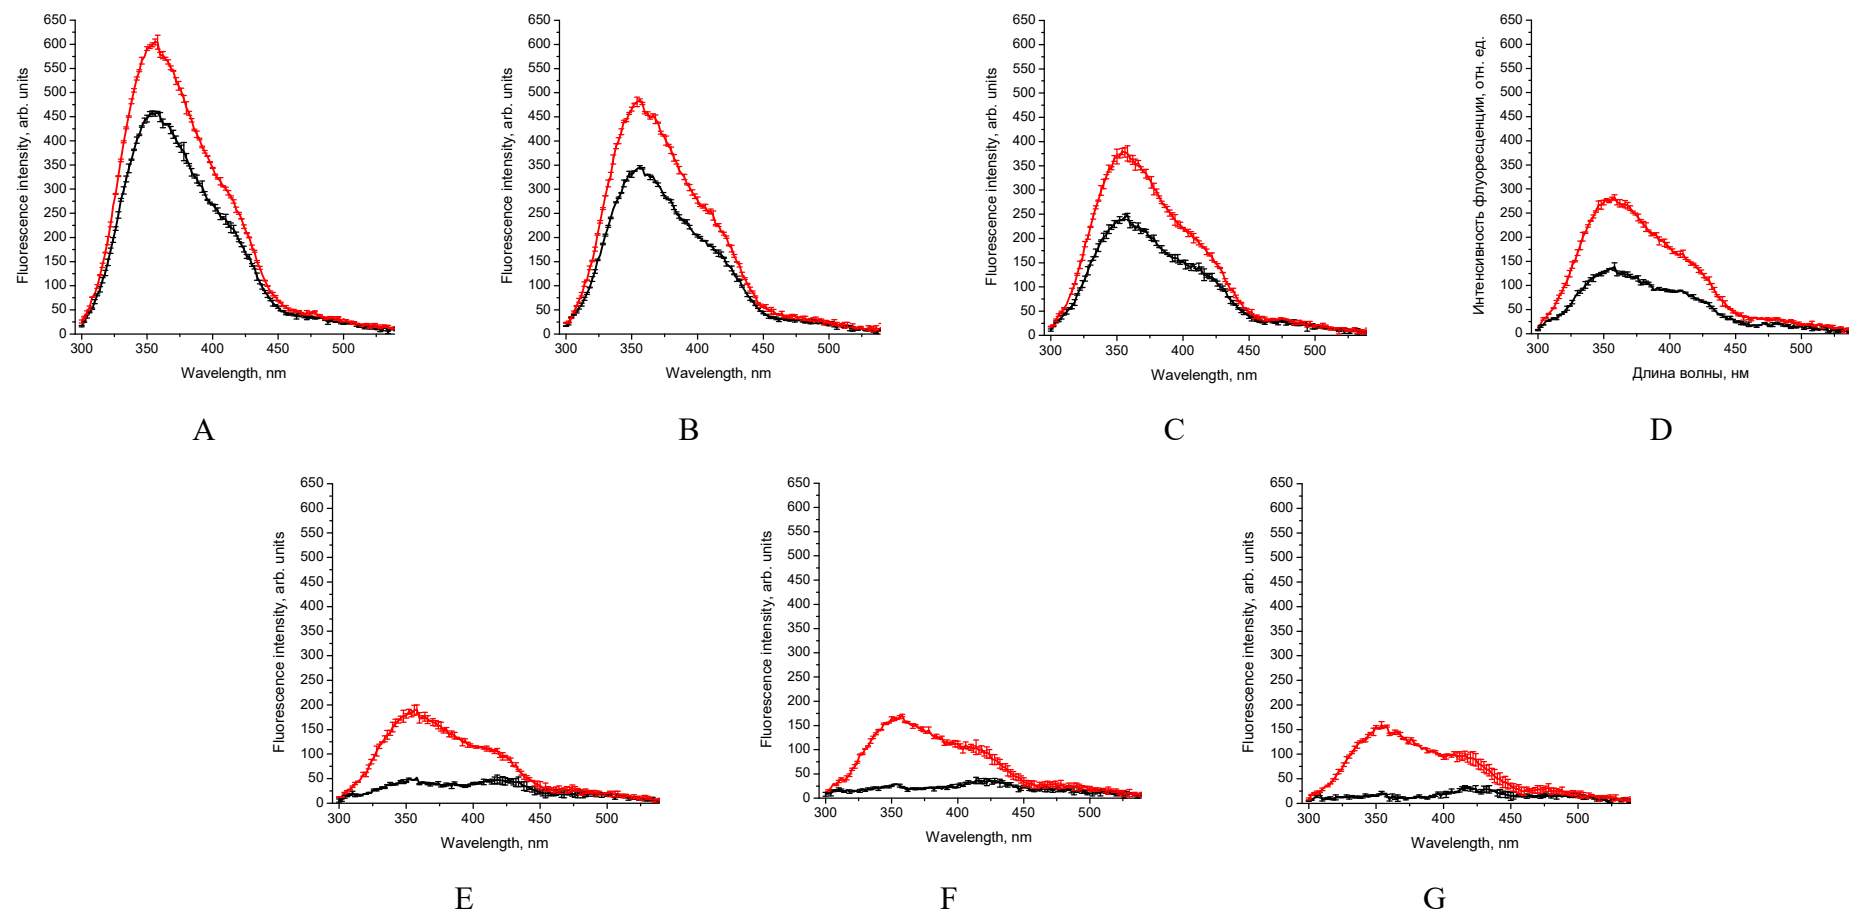

**Figure S7.** Fluorescence spectra of supernatants of the GNP6-IgG conjugate titrated with CRP at concentrations of 10 (A), 8 (B), 6 (C), 4 (D), 2 (E), 1 (F), and 0 (G) µg/mL. Red spectrum – after addition of 3.15 µg/mL CRP, black spectrum – without CRP.

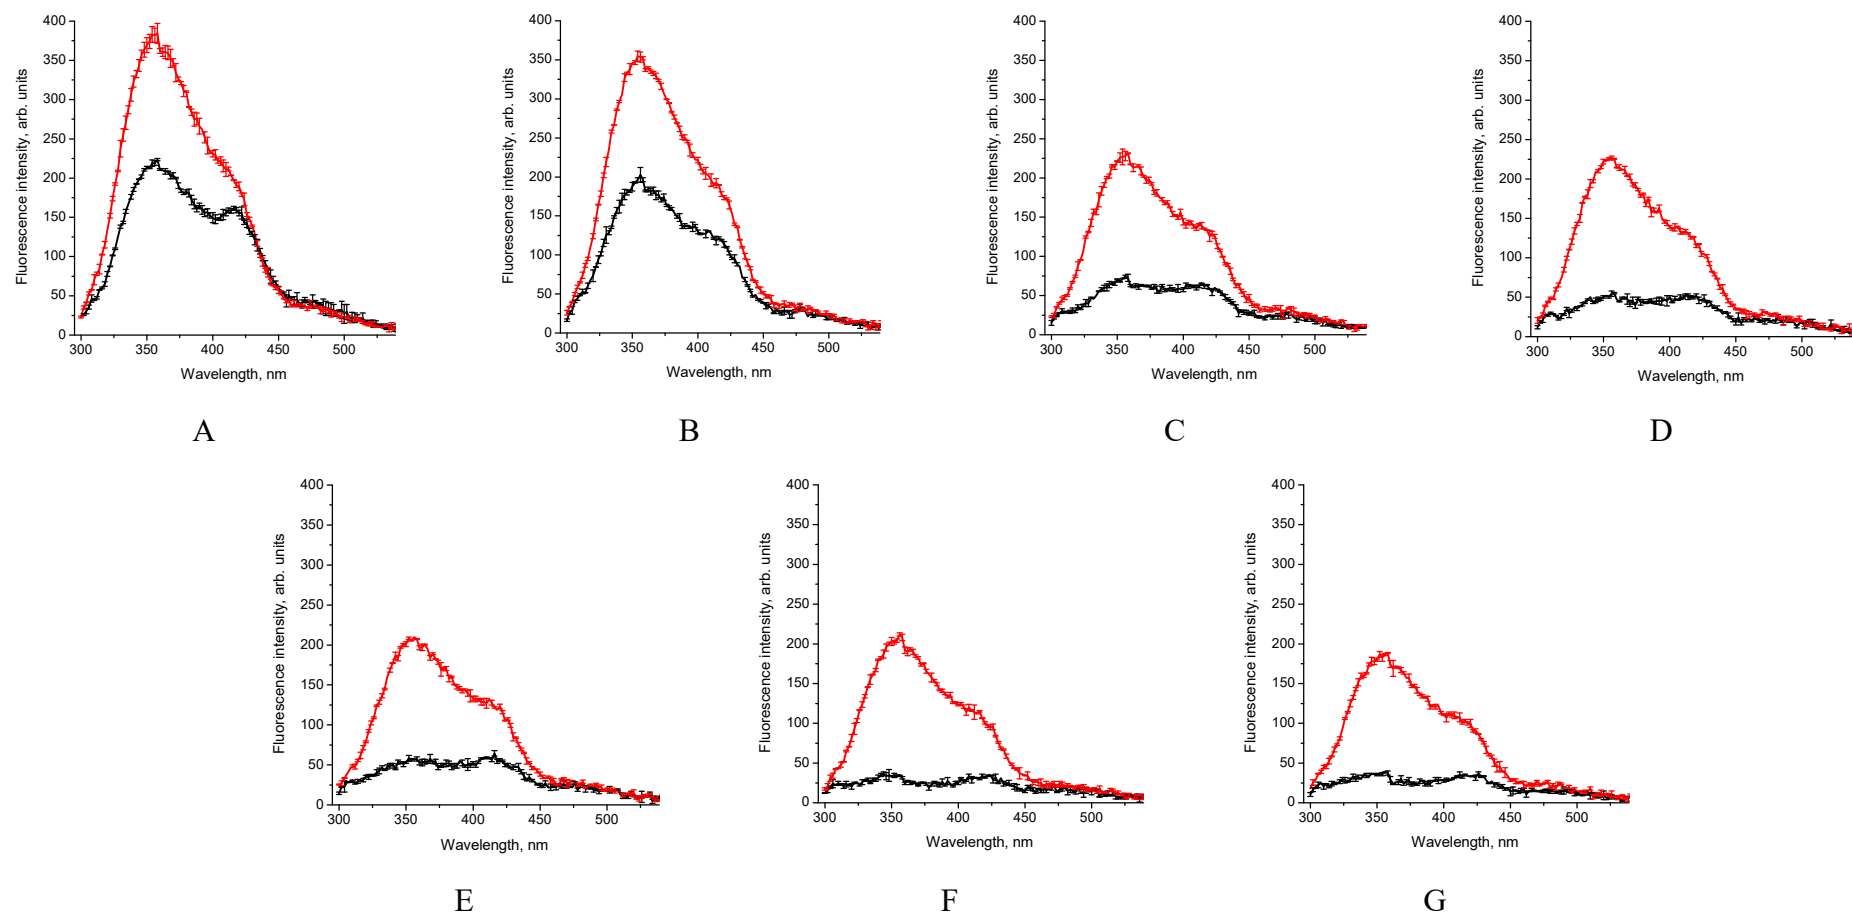

**Figure S8.** Fluorescence spectra of supernatants of the GNP2-IgG conjugate (monolayer) titrated with CRP at concentrations of 10 (A), 8 (B), 6 (C), 4 (D), 2 (E), 1 (F), and 0 (G)  $\mu\text{g/mL}$ . Red spectrum – after addition of 3.15  $\mu\text{g/mL}$  CRP, black spectrum – without CRP.

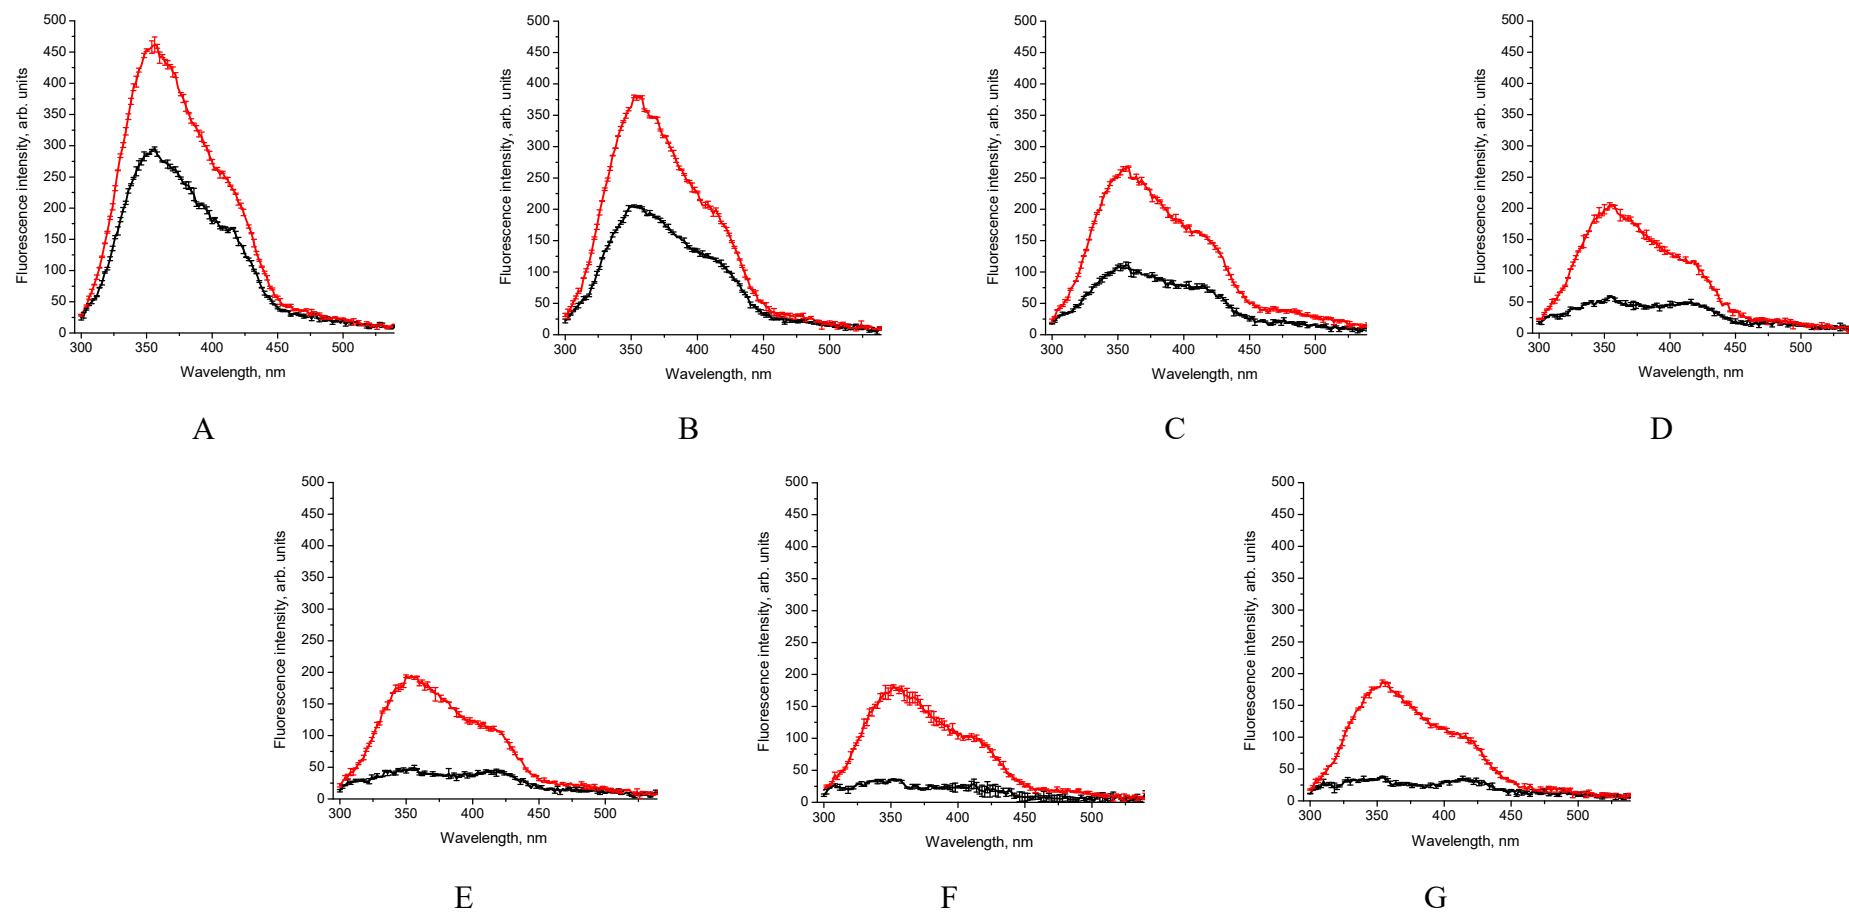

**Figure S9.** Fluorescence spectra of supernatants of the GNP2-IgG conjugate (1/2 monolayer) titrated with CRP at concentrations of 10 (A), 8 (B), 6 (C), 4 (D), 2 (E), 1 (F), and 0 (G)  $\mu\text{g/mL}$ . Red spectrum – after addition of 3.15  $\mu\text{g/mL}$  CRP, black spectrum – without CRP.

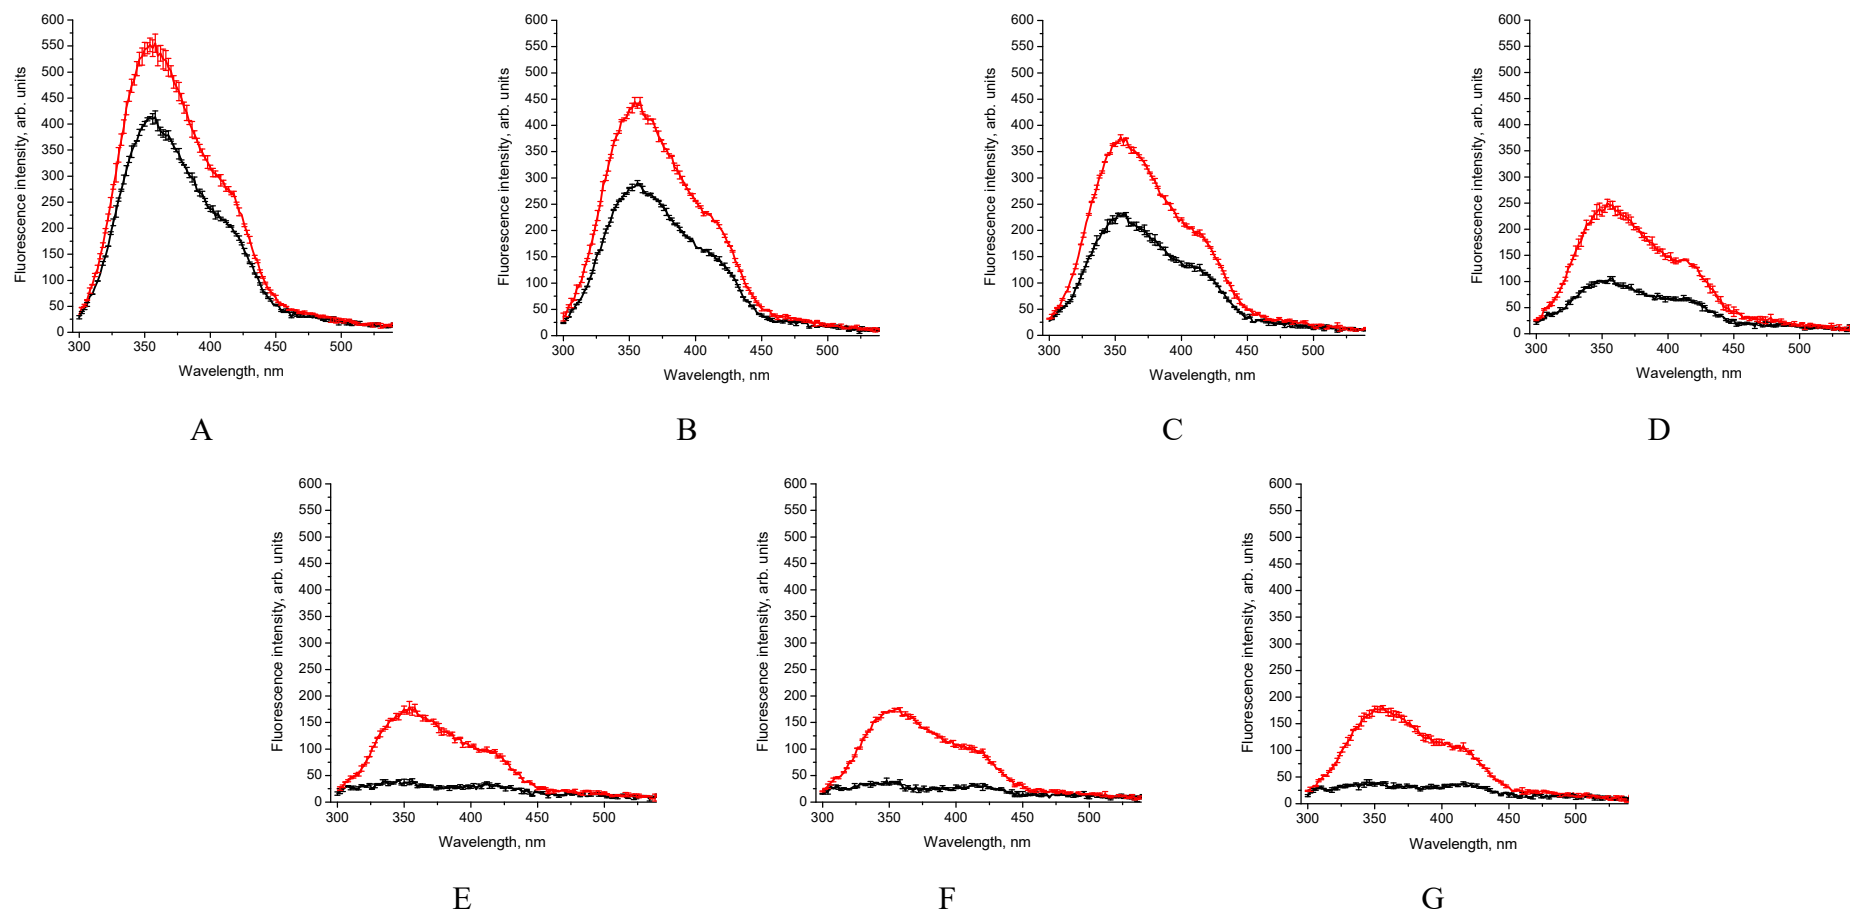

**Figure S10.** Fluorescence spectra of supernatants of the GNP2-IgG conjugate (1/4 monolayer) titrated with CRP at concentrations of 10 (A), 8 (B), 6 (C), 4 (D), 2 (E), 1 (F), and 0 (G) µg/mL. Red spectrum – after addition of 3.15 µg/mL CRP, black spectrum – without CRP.

**Table S1.** Results of measuring the fluorescence of supernatant solutions after centrifugation of conjugates with GNPs(1-6) and calculated concentrations of IgG in solutions and in the conjugates. Fluorescence signals are average fluorescence values at 350 nm for 2 replicates with subtracted background values for supernatants after centrifugation of pure GNPs(1-6) preparations stabilized with PEG-SH.

| N | Particle diameter, nm | Added antibodies, $\mu\text{g/mL}$ | Fluorescence in supernatants, arb. units | Error, % | Fluorescence in supernatants with added 3.15 $\mu\text{g/mL}$ IgG, arb. units | Error, % | Calibration signal from 3, 15 $\mu\text{g/mL}$ IgG, arb. units | IgG in supernatants, $\mu\text{g/mL}$ | IgG in conjugates, $\mu\text{g/mL}$ |
|---|-----------------------|------------------------------------|------------------------------------------|----------|-------------------------------------------------------------------------------|----------|----------------------------------------------------------------|---------------------------------------|-------------------------------------|
| 1 | 14.8                  | 12                                 | 144.7                                    | 3.5      | 224.4                                                                         | 3.2      | 73.5                                                           | 6.2                                   | 5.8                                 |
| 2 | 23.5                  | 7.4                                | 108                                      | 1.1      | 172.2                                                                         | 1.3      | 79.2                                                           | 4.3                                   | 3.1                                 |
| 3 | 28.6                  | 6.2                                | 85.1                                     | 1.2      | 150.8                                                                         | 0.3      | 75.6                                                           | 3.5                                   | 2.68                                |
| 4 | 34                    | 5.1                                | 76.1                                     | 3.6      | 143.2                                                                         | 0.3      | 71.3                                                           | 3.4                                   | 1.76                                |
| 5 | 43.3                  | 4.0                                | 71.4                                     | 1.8      | 125.3                                                                         | 1.2      | 73.8                                                           | 3.0                                   | 0.99                                |
| 6 | 54.5                  | 3.2                                | 55                                       | 1.5      | 115.6                                                                         | 2.7      | 71.6                                                           | 2.4                                   | 0.74                                |

**Table S2.** Calculated concentrations of CRP bound to conjugates of GNPs(1-6) and CRP unbound (remaining in supernatants).

|                             | GNP1                        |                         |                               |                         | GNP 2                       |                         |                               |                         |
|-----------------------------|-----------------------------|-------------------------|-------------------------------|-------------------------|-----------------------------|-------------------------|-------------------------------|-------------------------|
| Added CRP, $\mu\text{g/mL}$ | Bound CRP, $\mu\text{g/mL}$ | Error, $\mu\text{g/mL}$ | Unbound CRP, $\mu\text{g/mL}$ | Error, $\mu\text{g/mL}$ | Bound CRP, $\mu\text{g/mL}$ | Error, $\mu\text{g/mL}$ | Unbound CRP, $\mu\text{g/mL}$ | Error, $\mu\text{g/mL}$ |
| 0                           | 0                           | —                       | 0                             | —                       | 0                           | —                       | 0                             | —                       |
| 1                           | 0.94                        | 0.004                   | 0.06                          | 0.004                   | 0.96                        | 0.005                   | 0.04                          | 0.005                   |
| 2                           | 1.62                        | 0.098                   | 0.38                          | 0.098                   | 1.82                        | 0.008                   | 0.18                          | 0.008                   |
| 4                           | 3.61                        | 0.017                   | 0.39                          | 0.017                   | 3.54                        | 0.060                   | 0.46                          | 0.060                   |
| 6                           | 5.41                        | 0.023                   | 0.60                          | 0.023                   | 4.61                        | 0.021                   | 1.39                          | 0.021                   |
| 8                           | 7.04                        | 0.027                   | 0.96                          | 0.027                   | 4.8                         | 0.024                   | 3.20                          | 0.024                   |
| 10                          | 8.27                        | 0.049                   | 1.73                          | 0.049                   | —                           | —                       | —                             | —                       |

*continues*

|                             | GNP3                        |                         |                               |                         | GNP4                        |                         |                               |                         |
|-----------------------------|-----------------------------|-------------------------|-------------------------------|-------------------------|-----------------------------|-------------------------|-------------------------------|-------------------------|
| Added CRP, $\mu\text{g/mL}$ | Bound CRP, $\mu\text{g/mL}$ | Error, $\mu\text{g/mL}$ | Unbound CRP, $\mu\text{g/mL}$ | Error, $\mu\text{g/mL}$ | Bound CRP, $\mu\text{g/mL}$ | Error, $\mu\text{g/mL}$ | Unbound CRP, $\mu\text{g/mL}$ | Error, $\mu\text{g/mL}$ |
| 0                           | 0                           | —                       | 0                             | —                       | 0                           | —                       | 0                             | —                       |
| 1                           | 0.92                        | 0.008                   | 0.08                          | 0.008                   | 0.88                        | 0.007                   | 0.12                          | 0.007                   |
| 2                           | 1.83                        | 0.017                   | 0.17                          | 0.017                   | 1.45                        | 0.019                   | 0.55                          | 0.019                   |
| 4                           | 3.53                        | 0.031                   | 0.47                          | 0.031                   | 2.44                        | 0.040                   | 1.55                          | 0.040                   |
| 6                           | 4.5                         | 0.045                   | 1.46                          | 0.045                   | 3.07                        | 0.046                   | 2.93                          | 0.046                   |
| 8                           | 4.56                        | 0.102                   | 3.44                          | 0.102                   | 3.43                        | 0.089                   | 4.57                          | 0.089                   |

*continued*

|                             | GNP5                        |                         |                               |                         | GNP6                        |                         |                               |                         |
|-----------------------------|-----------------------------|-------------------------|-------------------------------|-------------------------|-----------------------------|-------------------------|-------------------------------|-------------------------|
| Added CRP, $\mu\text{g/mL}$ | Bound CRP, $\mu\text{g/mL}$ | Error, $\mu\text{g/mL}$ | Unbound CRP, $\mu\text{g/mL}$ | Error, $\mu\text{g/mL}$ | Bound CRP, $\mu\text{g/mL}$ | Error, $\mu\text{g/mL}$ | Unbound CRP, $\mu\text{g/mL}$ | Error, $\mu\text{g/mL}$ |
| 0                           | 0                           | —                       | 0                             | —                       | 0                           | —                       | 0                             | —                       |
| 1                           | 1                           | —                       | 0                             | —                       | 0.78                        | 0.007                   | 0.21                          | 0.007                   |
| 2                           | 1.24                        | 0.019                   | 0.75                          | 0.019                   | 1.32                        | 0.043                   | 0.68                          | 0.043                   |
| 4                           | 2.2                         | 0.022                   | 1.80                          | 0.022                   | 1.59                        | 0.032                   | 2.41                          | 0.032                   |
| 6                           | 2.22                        | 0.081                   | 3.78                          | 0.081                   | 0.88                        | 0.222                   | 5.12                          | 0.222                   |
| 8                           | 2.02                        | 0.047                   | 5.98                          | 0.047                   | —                           | —                       | —                             | —                       |

**Table S3.** Calculated concentrations of CRP bound to conjugates of GNP2 with different contents of IgG.

|                                | GNP2 conjugate,<br>1/4 of IgG monolayer |                         | GNP2 conjugate,<br>1/2 of IgG monolayer |                         | GNP2 conjugate,<br>IgG monolayer |                         |
|--------------------------------|-----------------------------------------|-------------------------|-----------------------------------------|-------------------------|----------------------------------|-------------------------|
| Added CRP,<br>$\mu\text{g/mL}$ | Bound CRP,<br>$\mu\text{g/mL}$          | Error, $\mu\text{g/mL}$ | Bound CRP,<br>$\mu\text{g/mL}$          | Error, $\mu\text{g/mL}$ | Bound CRP,<br>$\mu\text{g/mL}$   | Error, $\mu\text{g/mL}$ |
| 0                              | 0                                       | 0                       | 0                                       | 0                       | 0                                | 0                       |
| 1                              | 0.85                                    | 0.069                   | 0.96                                    | 0.112                   | 0.77                             | 0.146                   |
| 2                              | 1.85                                    | 0.093                   | 1.70                                    | 0.114                   | 1.54                             | 0.126                   |
| 4                              | 2.37                                    | 0.005                   | 3.52                                    | 0.081                   | 3.42                             | 0.186                   |
| 6                              | 1.55                                    | 0.027                   | 4.36                                    | 0.003                   | 5.22                             | 0.054                   |
| 8                              | 2.23                                    | 0.176                   | 4.18                                    | 0.217                   | —                                | —                       |
| 10                             | 1.57                                    | 0.003                   | 4.42                                    | 0.168                   | 6.29                             | 0.017                   |
